# Supplementary material for: Acute Infectious Morbidity in Multiple Gestation
Source: Hindawi journal article supplement (doi:10.1155/2015/173261), 2015-01-01
Supplement: f1 [file 173261.f1.pdf]

**Table S1.** ICD-9 codes for pre-existing medical conditions, medical events, and obstetric complications utilized to identify cases in the NIS 2008 – 2010.

| <b>Medical Condition</b>                                                           | <b>ICD-9 codes</b>                                                                |
|------------------------------------------------------------------------------------|-----------------------------------------------------------------------------------|
| <b>Pulmonary Disease</b>                                                           |                                                                                   |
| Asthma                                                                             | 493.x                                                                             |
| <b>Endocrine</b>                                                                   |                                                                                   |
| Diabetes (non-gestational)                                                         | 249.x, 250.x, 648.0x                                                              |
| Thyroid disease                                                                    | 240.x-246.x, 648.1x                                                               |
| <b>Autoimmune</b>                                                                  |                                                                                   |
| Systemic lupus erythema.                                                           | 710.0, 695.4, 583.8                                                               |
| Rheumatoid arthritis/ collagen vascular disease                                    | 701.0, 710, 710.1x-710.9x, 714.x, 720.x, 725                                      |
| <b>Hematologic</b>                                                                 |                                                                                   |
| Thrombophilia (includes history of thrombosis and antiphospholipid syndrome [APS]) | 273.8, 286.53, 286.9, 289.81, 289.82, V12.51                                      |
| Anemia                                                                             | 648.2x, 280.x, 285.x                                                              |
| Thrombocytopenia                                                                   | 287.3x, 287.4x, 287.5x                                                            |
| <b>Drug/Alcohol/Tobacco</b>                                                        |                                                                                   |
| Drug use                                                                           | 292.x, 304.x, 305.2x-305.9x, 655.5x, 760.70, 760.72-760.75, 779.5, 965.0x, V65.42 |
| Alcohol use                                                                        | 291.x, 303.x, 305.0x, 760.71, 980.0x                                              |
| Smoking                                                                            | 305.1, V15.82, 649.0x                                                             |
| <b>Chronic hypertension/renal failure</b>                                          |                                                                                   |
| Chronic Hypertension                                                               | 401.x-405.x, 437.2, 642.0x-642.2x                                                 |
| Chronic Renal Failure                                                              | 585.x, 792.5, V42.0, V45.1, V56.x                                                 |
| <b>Event or Condition</b>                                                          |                                                                                   |
| <b>Infections</b>                                                                  |                                                                                   |
| Sepsis                                                                             | 038.x, 790.7                                                                      |
| Bacteremia                                                                         | 790.7                                                                             |
| Meningitis                                                                         | 320.x, 321-321.8, 322.x                                                           |

|                                                     |                                          |
|-----------------------------------------------------|------------------------------------------|
| Otitis media                                        | 382.x                                    |
| Pharyngitis                                         | 462, 034.0                               |
| Sinusitis                                           | 461.x                                    |
| Pneumonia                                           | 480-486                                  |
| Influenza                                           | 487.x-488.x                              |
| Gastrointestinal infections                         | 001-009.3                                |
| Appendicitis                                        | 540-542                                  |
| Urinary Tract Infections                            | 599.0                                    |
| Pyelonephritis                                      | 590.x                                    |
| Cellulitis/skin abscess                             | 681.x                                    |
| MRSA infection(unspecified site)                    | 482.42                                   |
| <b>Obstetric Events</b>                             |                                          |
| Multiple Gestation                                  | 651.x, 652.6x, V27.2-V27.7               |
| Operative vaginal delivery                          | Procedure codes: 720-724, 726, 727-727.9 |
| Gestational diabetes                                | 648.8x                                   |
| Preeclampsia, eclampsia or gestational hypertension | 642.3x-642.7x                            |
| Preterm labor                                       | 644.x                                    |
| Placental abruption                                 | 641.2x                                   |
| Fetal growth restriction                            | 656.5x                                   |
| Intrauterine fetal death                            | 656.4x                                   |
| Placenta previa                                     | 641.0-641.1x                             |
| Postpartum hemorrhage                               | 666-666.2x                               |
| Chorioamnionitis                                    | 658.4x, 659.2x                           |

**Supplemental Table 2:** Multivariable logistic regression analysis by mode of delivery for the listed infectious outcomes among women with multiple gestations, excluding those with specific codes for triplets and quadruplets, compared to women with singleton gestations while controlling for *age, race/ethnicity, insurance status, length of hospital stay, chronic hypertension, gestational diabetes, diabetes, asthma, HIV, systemic lupus erythematosus [19], collagen vascular disease/rheumatoid arthritis, anemia, thrombocytopenia, and preterm labor*. There were 250,234 multiple gestation deliveries (excluding triplets and quadruplets) and 12,257,367 deliveries to women with a singleton.

|                                | Cesarean delivery    |         | Vaginal delivery     |         |
|--------------------------------|----------------------|---------|----------------------|---------|
|                                | Adjusted OR (95% CI) | p-value | Adjusted OR (95% CI) | p-value |
| Sepsis                         | 0.33 (0.26, 0.41)    | <0.0001 | 1.29 (1.05, 1.57)    | 0.0124  |
| Pneumonia                      | 0.67 (0.59, 0.76)    | <0.0001 | 3.14 (2.78, 3.53)    | <0.0001 |
| Influenza                      | 0.98 (0.73, 1.29)    | 0.90    | 3.79 (3.17, 4.50)    | <0.0001 |
| Intestinal infectious diseases | 1.24 (0.99, 1.53)    | 0.055   | 5.54 (4.74, 6.44)    | <0.0001 |
| Appendicitis                   | 0.18 (0.09, 0.31)    | <0.0001 | 4.75 (3.81, 5.86)    | <0.0001 |
| Urinary Tract infections       | 0.85 (0.81, 0.90)    | <0.0001 | 2.28 (2.18, 2.38)    | <0.0001 |
| Pyelonephritis                 | 0.75 (0.63, 0.88)    | 0.0006  | 5.85 (5.45, 6.28)    | <0.0001 |
| <b>Composite Infection</b>     | 0.84 (0.80, 0.87)    | <0.0001 | 2.97 (2.88, 3.07)    | <0.0001 |
